# Supplementary material for: A Novel Polyamine-Targeted Therapy for BRAF Mutant Melanoma Tumors
Source: Med Sci (Basel). 2018 Jan 5;6(1):3. doi: 10.3390/medsci6010003 (PMC5872160; doi:10.3390/medsci6010003)
Supplement: Supplementary file 1 [file medsci-06-00003-s001.pdf]

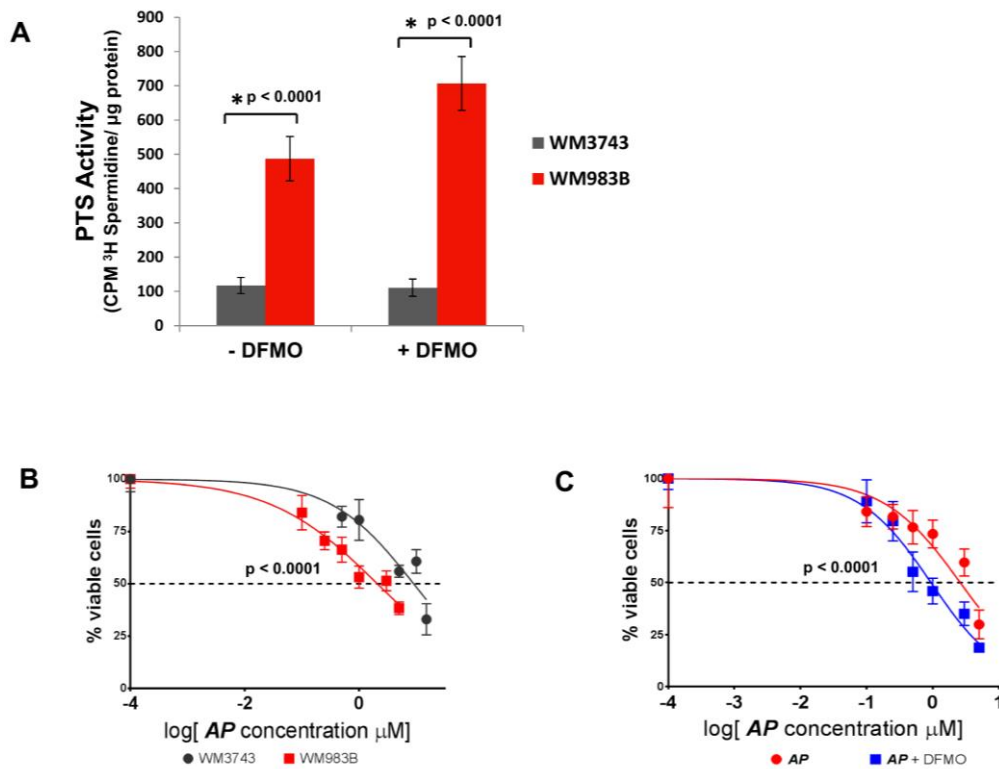

**Figure S1.** Greater PTS Activity and Increased Sensitivity to *AP* in *BRAF*<sup>V600E</sup> Human Melanoma Cells Compared to *BRAF*<sup>WT</sup> Cells. (A) *BRAF*<sup>V600E</sup> WM983B melanoma cells and *BRAF*<sup>WT</sup> WM3743 melanoma cells were cultured with and without 1 mM DFMO for 40 h and then pulsed with 0.5 μM <sup>3</sup>H-spermidine for 60 minutes at 37°C. Cells were washed with cold PBS containing 50 μM spermidine, and cell lysates were assayed for CPM <sup>3</sup>H-spermidine per mg protein by scintillation counting. (B) WM983B and WM3743 melanoma cells were treated with increasing doses of *AP*. After 72 h of culture, cell survival was determined via EZQuant™ Cell Quantifying assay. IC50 values were calculated by GraphPad Prism 6. (C) WM983B melanoma cells were treated with increasing doses of *AP* with or without 1 mM DFMO. After 72 h of culture, cell survival was determined via EZQuant™ Cell Quantifying assay. 72 h IC50 values were calculated by GraphPad Prism 6. Values are the mean of 5-6 samples ± SD.
